# Supplementary material for: Development, factor structure and application of the Dog Obesity Risk and Appetite (DORA) questionnaire
Source: PubMed Central journal article supplement (PMC4592153; doi:10.7717/peerj.1278), 2015-09-29
Supplement: peerj-03-1278-s003.pdf [file peerj-03-1278-s003.pdf]

# Dog Obesity Risk Assessment Questionnaire

This document has been prepared to give an overview of how the questionnaire was presented to owners in the current study (Raffan et al 2015). Since the original was administered via a commercially available online software package, it is not entirely representative of the format presented to owners, but gives a good indication of what they saw and the representative screenshot below shows how it appeared online. **BOLD CAPITALS** indicate the order of items which appeared on the website to owners, but do not form the core questionnaire.

## Representative screen-shot of questionnaire displayed in web browser:

**UNIVERSITY OF CAMBRIDGE**

**GOdogs**  
Investigating the Genetics of Obesity in Dogs

Please read the statements below and choose the response most appropriate to your dog.

|                                                                                  | Never                 | Rarely                | Sometimes             | Often                 | Always                |
|----------------------------------------------------------------------------------|-----------------------|-----------------------|-----------------------|-----------------------|-----------------------|
| My dog gets excited when there is food around                                    | <input type="radio"/> | <input type="radio"/> | <input type="radio"/> | <input type="radio"/> | <input type="radio"/> |
| My dog spends most of his/her walks off the lead                                 | <input type="radio"/> | <input type="radio"/> | <input type="radio"/> | <input type="radio"/> | <input type="radio"/> |
| My dog gets human leftovers in his/her food bowl                                 | <input type="radio"/> | <input type="radio"/> | <input type="radio"/> | <input type="radio"/> | <input type="radio"/> |
| My dog hangs around for titbits even if there is not much chance of getting them | <input type="radio"/> | <input type="radio"/> | <input type="radio"/> | <input type="radio"/> | <input type="radio"/> |
| My dog is choosy about which titbits he eats                                     | <input type="radio"/> | <input type="radio"/> | <input type="radio"/> | <input type="radio"/> | <input type="radio"/> |
|                                                                                  | Never                 | Rarely                | Sometimes             | Often                 | Always                |
| My dog hangs around when I am preparing or eating human food                     | <input type="radio"/> | <input type="radio"/> | <input type="radio"/> | <input type="radio"/> | <input type="radio"/> |
| My dog will turn down food if s/he is not hungry                                 | <input type="radio"/> | <input type="radio"/> | <input type="radio"/> | <input type="radio"/> | <input type="radio"/> |
| My dog finishes a meal straight away                                             | <input type="radio"/> | <input type="radio"/> | <input type="radio"/> | <input type="radio"/> | <input type="radio"/> |

## PROJECT LOGO AND UNIVERSITY OF CAMBRIDGE LOGO

## NAMES AND CONTACT DETAILS OF STUDY INVESTIGATORS

### INTRODUCTION:

The GOdogs project is investigating the genetics of obesity and appetite in dogs. Our overall aim is to improve dog and hopefully human health by understanding obesity and how to prevent and treat it. We have developed this short questionnaire as a way of scoring dogs' attitudes to food so we can compare individual dogs' and dog breeds' attitudes to food. It takes 5-10 minutes to complete and we would be extremely grateful if you would take the time to answer the questions.

## QUESTIONS TO COLLECT INFORMATION ABOUT DOG SIGNALMENT AND OWNER CONTACT (VOLUNTARY)

### NEW WEBPAGE

## CORE DORA QUESTIONNAIRE SECTION (TWO QUESTIONS A AND B BELOW)

A) Please read the statements below and choose the response most appropriate to your dog.

|                                                                                  | Never                 | Rarely                | Sometimes             | Often                 | Always                |
|----------------------------------------------------------------------------------|-----------------------|-----------------------|-----------------------|-----------------------|-----------------------|
| My dog gets excited when there is food around                                    | <input type="radio"/> | <input type="radio"/> | <input type="radio"/> | <input type="radio"/> | <input type="radio"/> |
| My dog spends most of his/her walks off the lead                                 | <input type="radio"/> | <input type="radio"/> | <input type="radio"/> | <input type="radio"/> | <input type="radio"/> |
| My dog gets human leftovers in his/her food bowl                                 | <input type="radio"/> | <input type="radio"/> | <input type="radio"/> | <input type="radio"/> | <input type="radio"/> |
| My dog hangs around for titbits even if there is not much chance of getting them | <input type="radio"/> | <input type="radio"/> | <input type="radio"/> | <input type="radio"/> | <input type="radio"/> |
| My dog is choosy about which titbits he eats                                     | <input type="radio"/> | <input type="radio"/> | <input type="radio"/> | <input type="radio"/> | <input type="radio"/> |
| My dog hangs around when I am preparing or eating human food                     | <input type="radio"/> | <input type="radio"/> | <input type="radio"/> | <input type="radio"/> | <input type="radio"/> |
| My dog will turn down food if s/he is not hungry                                 | <input type="radio"/> | <input type="radio"/> | <input type="radio"/> | <input type="radio"/> | <input type="radio"/> |
| My dog finishes a meal straight away                                             | <input type="radio"/> | <input type="radio"/> | <input type="radio"/> | <input type="radio"/> | <input type="radio"/> |
| My dog inspects unfamiliar foods before deciding whether to eat them             | <input type="radio"/> | <input type="radio"/> | <input type="radio"/> | <input type="radio"/> | <input type="radio"/> |
| My dog runs around a lot                                                         | <input type="radio"/> | <input type="radio"/> | <input type="radio"/> | <input type="radio"/> | <input type="radio"/> |
| After a meal my dog is still interested in eating                                | <input type="radio"/> | <input type="radio"/> | <input type="radio"/> | <input type="radio"/> | <input type="radio"/> |
| My dog takes his/her time to eat a meal                                          | <input type="radio"/> | <input type="radio"/> | <input type="radio"/> | <input type="radio"/> | <input type="radio"/> |
| My dog eats titbits straight away                                                | <input type="radio"/> | <input type="radio"/> | <input type="radio"/> | <input type="radio"/> | <input type="radio"/> |
| My dog gets bits of human food when we are eating                                | <input type="radio"/> | <input type="radio"/> | <input type="radio"/> | <input type="radio"/> | <input type="radio"/> |

NEW WEBPAGE

B) As before, please read the following statements and choose the option most appropriate to your dog. The headings for the answers have changed for this section.

|                                                                                 | Not at all true       | Somewhat true         | Mainly true           | Definitely true       |
|---------------------------------------------------------------------------------|-----------------------|-----------------------|-----------------------|-----------------------|
| My dog would eat anything                                                       | <input type="radio"/> | <input type="radio"/> | <input type="radio"/> | <input type="radio"/> |
| My dog is very fit                                                              | <input type="radio"/> | <input type="radio"/> | <input type="radio"/> | <input type="radio"/> |
| My dog often gets human food                                                    | <input type="radio"/> | <input type="radio"/> | <input type="radio"/> | <input type="radio"/> |
| My dog gets an upset tummy on some foods                                        | <input type="radio"/> | <input type="radio"/> | <input type="radio"/> | <input type="radio"/> |
| I think my dog could do with losing some weight                                 | <input type="radio"/> | <input type="radio"/> | <input type="radio"/> | <input type="radio"/> |
| My dog's walks are mostly on the lead                                           | <input type="radio"/> | <input type="radio"/> | <input type="radio"/> | <input type="radio"/> |
| I restrict my dog's exercise because of veterinary advice                       | <input type="radio"/> | <input type="radio"/> | <input type="radio"/> | <input type="radio"/> |
| I alter the food my dog gets in order to control his/her weight                 | <input type="radio"/> | <input type="radio"/> | <input type="radio"/> | <input type="radio"/> |
| My dog seems to be hungry all the time                                          | <input type="radio"/> | <input type="radio"/> | <input type="radio"/> | <input type="radio"/> |
| My dog's walks involve a lot of energetic play or chasing                       | <input type="radio"/> | <input type="radio"/> | <input type="radio"/> | <input type="radio"/> |
| I am careful about my dog's weight                                              | <input type="radio"/> | <input type="radio"/> | <input type="radio"/> | <input type="radio"/> |
| My dog has a sensitive stomach                                                  | <input type="radio"/> | <input type="radio"/> | <input type="radio"/> | <input type="radio"/> |
| My dog is very greedy                                                           | <input type="radio"/> | <input type="radio"/> | <input type="radio"/> | <input type="radio"/> |
| My dog regularly sees the vet for health problems                               | <input type="radio"/> | <input type="radio"/> | <input type="radio"/> | <input type="radio"/> |
| I am happy with my dog's weight                                                 | <input type="radio"/> | <input type="radio"/> | <input type="radio"/> | <input type="radio"/> |
| I weigh or measure how much food I give my dog                                  | <input type="radio"/> | <input type="radio"/> | <input type="radio"/> | <input type="radio"/> |
| I am careful to regulate the exercise my dog gets in order to keep him/her slim | <input type="radio"/> | <input type="radio"/> | <input type="radio"/> | <input type="radio"/> |
| My dog gets a lot of exercise                                                   | <input type="radio"/> | <input type="radio"/> | <input type="radio"/> | <input type="radio"/> |
| My dog often gets tummy upsets                                                  | <input type="radio"/> | <input type="radio"/> | <input type="radio"/> | <input type="radio"/> |
| My dog gets no food at human mealtimes                                          | <input type="radio"/> | <input type="radio"/> | <input type="radio"/> | <input type="radio"/> |
| My dog would eat non-food objects like stones, toys or socks.                   | <input type="radio"/> | <input type="radio"/> | <input type="radio"/> | <input type="radio"/> |

**NEW WEBPAGE**

**BODY CONDITION CHART AND SCORE SELECTION**

**TWO COMMENTS BOXES (FREE TEXT)**

- A) Use this box to tell us anything about your dog's eating behaviour, weight, or management that you think is important.
- B) This is a pilot survey - the final version will include only a small sample of the questions you have patiently answered. Please let us know here if there are any questions you found hard to answer.

**'CAPTCHA' (Completely Automated Public Turing test to tell Computers and Humans Apart)**

**NEW WEBPAGE**

**THANK YOU, CONSENT STATEMENTS, REPEAT OF PROJECT AND INVESTIGATOR CONTACTS**
