# Supplementary material for: Development, factor structure and application of the Dog Obesity Risk and Appetite (DORA) questionnaire
Source: PeerJ journal article supplement (doi:10.7717/peerj.1278), 2015-09-29
Supplement: Supp_file_1_Semistructured_interview_guide.pdf [file Supp_file_1_Semistructured_interview_guide.pdf]

**Supplementary file 1: Primer used during semi-structured interviews.**

**Introduction:** My name is ER and I'm the vet running the GOdogs project at the U of C. Thank you for volunteering for our study. I'd really like to hear a bit about \_\_\_\_, in particular his/her attitude to food.

**Next, start a deliberately unstructured part of the conversation,** asking the owner to volunteer information. Usually prompted by asking the following:

'Perhaps you can start by telling me what \_\_\_\_ is like with food?'

And later:

'Why do you think \_\_\_\_ is the size and shape he/she is?'

'How long have you had \_\_\_\_?'

'What else goes on for \_\_\_\_ in every day – daily life, exercise and so on?'

The owner's responses should be used as a guide for the subsequent conversation, and to ensure the **following topics were covered. Example questions are included for each topic.**

|                   | Topic                      | Example Questions                                                                                                                                                                                                                                                                                                                                                                                               |
|-------------------|----------------------------|-----------------------------------------------------------------------------------------------------------------------------------------------------------------------------------------------------------------------------------------------------------------------------------------------------------------------------------------------------------------------------------------------------------------|
| <b>Dog Topics</b> |                            |                                                                                                                                                                                                                                                                                                                                                                                                                 |
| a                 | Responsiveness to food     | How do you feed ____? What happens at feeding time?                                                                                                                                                                                                                                                                                                                                                             |
| b                 | Speed of eating            | Describe how ____ eats                                                                                                                                                                                                                                                                                                                                                                                          |
| c                 | Satiety responsiveness     | What's ____ like once the food is finished?                                                                                                                                                                                                                                                                                                                                                                     |
| d                 | General interest in eating | What do you feed ____?<br>Is ____ choosy about different foods?<br>Does he/she get any titbits or human food? What, and how often? What's ____ like when offered food between his/her usual meals?<br>What's ____ like when you are preparing human food?<br>What's ____ like when you are eating?<br>Do you have other dogs? Have you had other dogs in the past?<br>How does ____'s attitude to food compare? |
| e                 | Food fussiness             |                                                                                                                                                                                                                                                                                                                                                                                                                 |
| f                 | Emotional eating           | Does ____ ever go off food? If so, why? What about when you go away from home?<br>Does food help when he/she is frightened or upset?<br>How useful is food as a training aid or reward?                                                                                                                                                                                                                         |
| g                 | Scavenging/stealing food   | Does he/she steal food? Dog food? Other pets' food? Human food?<br>What's he/she like when he/she comes across discarded human food or disgusting stuff on a walk?<br>Does ____ seek out food when out on walks or in the garden?                                                                                                                                                                               |
| h                 | Food related aggression    | What's he/she like when there's food around? Does ____ get grumpy around food?                                                                                                                                                                                                                                                                                                                                  |

| Owner Management Topics |                          |                                                                                                                                                                                                                                                                              |
|-------------------------|--------------------------|------------------------------------------------------------------------------------------------------------------------------------------------------------------------------------------------------------------------------------------------------------------------------|
| a                       | Control over eating      | See a-d above.<br>Do you measure how much you feed? How?<br>Do you interfere if ___ finds something edible out and about?                                                                                                                                                    |
| b                       | Prompting/encouragement  | See a-d above.<br>Do you do anything to make food more interesting? Do you ever change ___'s diet? Why?<br>Do you have to encourage ___ to eat? How?                                                                                                                         |
| c                       | Instrumental feeding     | Do you use food rewards in training? Did you in the past? How helpful are/were they?                                                                                                                                                                                         |
| d                       | Emotional feeding        | See (f) above.                                                                                                                                                                                                                                                               |
| e                       | Importance of body shape | Are you happy with ___ weight? Do you think he/she could do with losing or gaining any weight?<br>What do you do to maintain that weight? What do you do to alter it? How important is it to keep a dog at a healthy weight?                                                 |
| f                       | Exercise                 | What sort of exercise does ___ get? Do you/how do you play with your dog? Does he/she work or do agility? Does he/she match a human exercise programme?<br>How long do you spend taking your dog out each day? How does that vary through the week/year?                     |
| g                       | Level of training        | Does he/she work or do agility?<br>What's his/her personality like?<br>How well trained is your dog? How do you think it may influence your dog's behaviour around food, if at all?<br>How well can you control behaviour around food that you don't like (like scavenging)? |
| h                       | Health                   | Tell me about his/her health. Any one off or recurrent problems over the years? Is he/she on any long term treatment or has he/she been in the past?<br>Does ___ ever get tummy upsets? Are there any things he/she can't eat?                                               |

**Conclusion:**

Do you have any questions for me?

Thank you; explain how to find out more about the project and future results; discuss whether owner would mind being contacted in future.

---
